# Supplementary material for: Evaluation of Oral Mucosal Lesions Using the IllumiScan® Fluorescence Visualisation Device: Distinguishing Squamous Cell Carcinoma
Source: MDPI journal article supplement (doi:10.3390/ijerph191610414), 2022-08-21
Supplement: s1 [file s1]

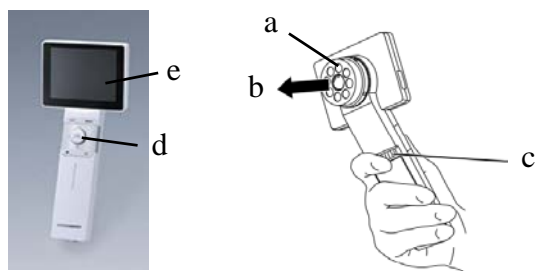

Figure S1. The IllumiScan® fluorescence visualisation device (Shoufu, Kyoto, Japan)

Eight LED ring lights (a) emit 425-nm blue light (b). The camera is focused using the dial (c), and the picture is captured using the centre button (d). The image is checked on a monitor (e). Source: IllumiScan® user manual.

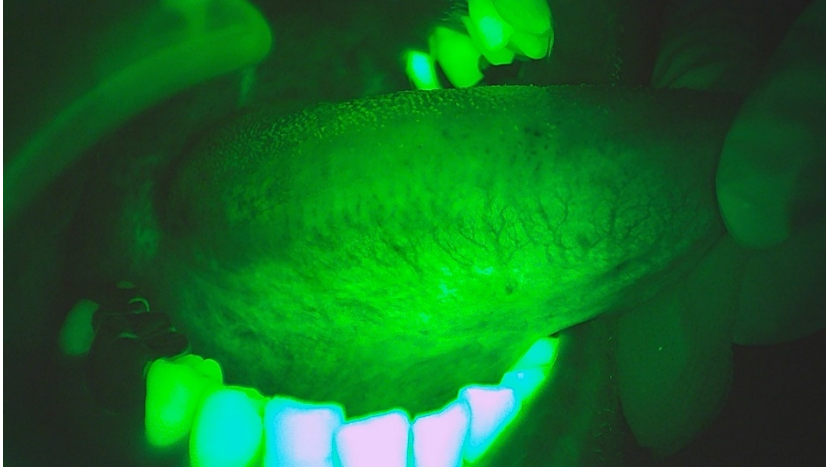

Figure S2. The right side of a participant's tongue showing normal mucosa in the fluorescence visualisation image.

In a 55-year-old man, autofluorescence (green) of the sublingual mucosa is observed. The sublingual vein under the mucosa absorbs the irradiated light so that the blood vessel can be observed as a result of loss of fluorescence.

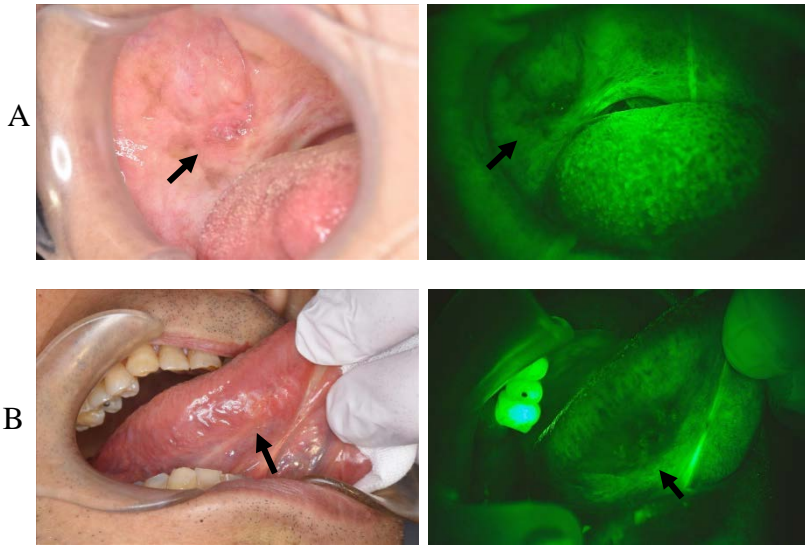

Figure S3. IllumiScan® is highly sensitive. It is easy to miss lesions in intraoral photographs, but with IllumiScan®, fluorescence loss in lesions can be clearly observed.

A) A large (8 mm) ulcer is observed on the right buccal mucosa, but it was difficult to visualise it under white light. The pathological diagnosis was squamous cell carcinoma (SCC). Clear fluorescence loss is observed in the IllumiScan® image.

B) A  $21 \times 10$ -mm mass is observed on the sublingual surface of the lower left bicuspid. The surface was erythematous, and there was induration around it. However, this was difficult to observe under white light. The pathological diagnosis was SCC. Clear fluorescence loss can be observed in the IllumiScan® image.

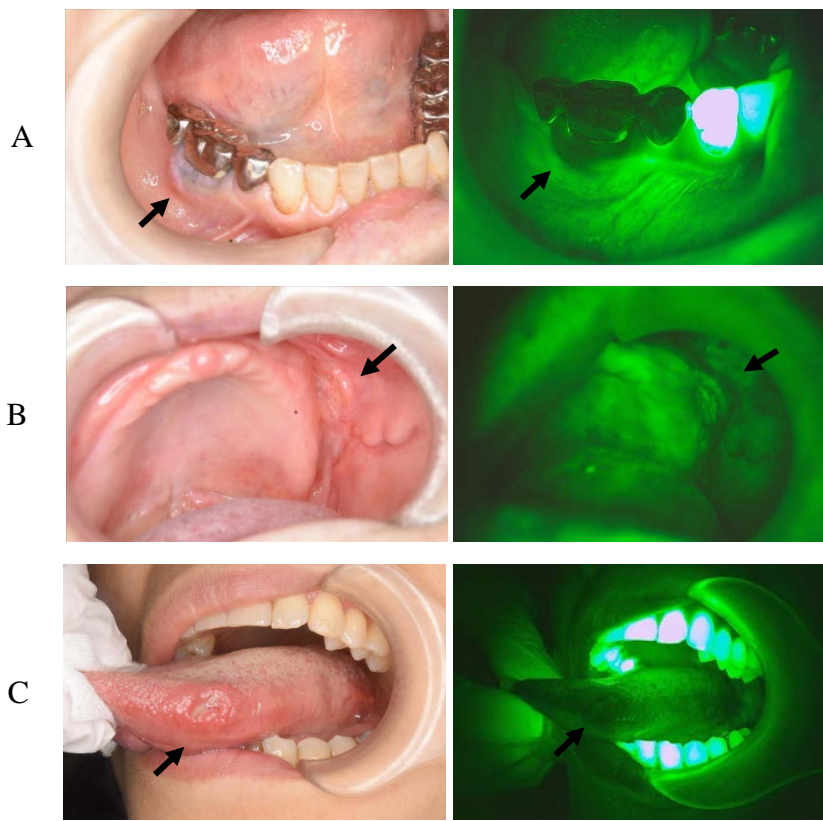

Figure S4. It is difficult to distinguish between cancer and inflammation in fluorescence visualisation images.

A) Fluorescence visualisation loss (FVL) in the gingiva of the cervical region of the lower right molar. Pathological results showed chronic mucositis.

B) FVL is seen at the left-lateral gingival border transition. Pathological results showed an irritation fibroma with ulceration.

C) FVL at the left lingual border. Pathological examination revealed an inflammatory lesion.

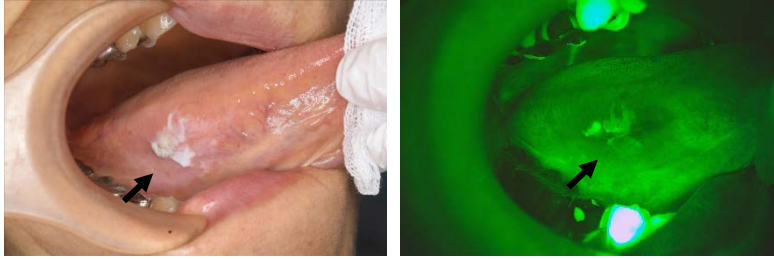

Figure S5. Enhanced intensity due to hyperkeratosis obscures the lesion.

A white lesion measuring  $25 \times 10$  mm is visible on the right lingual margin. The lesion was a fine granular mass with a central induration of  $5 \times 5$  mm. The pathological diagnosis was squamous cell carcinoma. Fluorescence visualisation loss in the lesion was obscured by fluorescent intensity enhancement in the keratinised area on the fluorescence visualisation image.

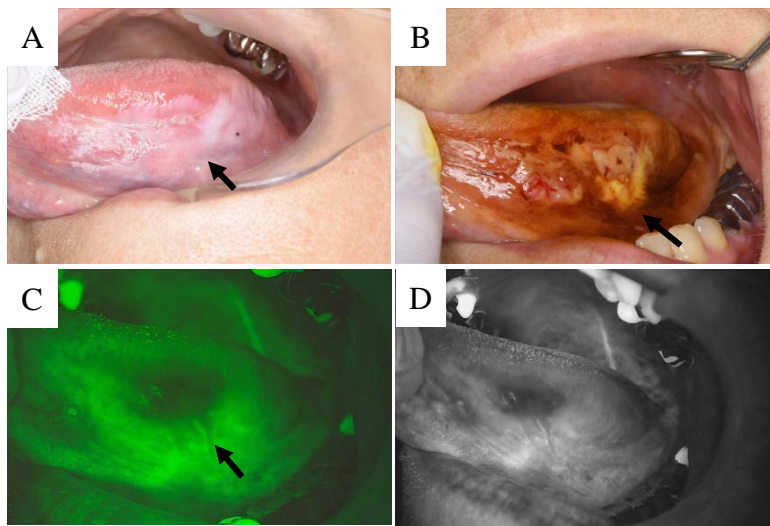

Figure S6. Determining the region of interest (ROI).

The lesion on the left tongue, with a 10-mm large ulcer and surrounding white patches was histopathologically diagnosed as squamous cell carcinoma.

A) Photograph was taken under white light. B) Lugol's staining. C) Illumiscan images. D) The ROI (solid yellow line) of the lesion was defined as the area with fluorescence visualisation loss in the black-and white image created from the Green image. Then, the intensity in the ROI was measured with ImageJ software.

Table S1. Comparison of our results with those of other facilities

| Equipment          | Author                  | Facility                            | Year      | Lesion      | Cases | Image analysis | Average area                        | Average FI | Average CV  |
|--------------------|-------------------------|-------------------------------------|-----------|-------------|-------|----------------|-------------------------------------|------------|-------------|
| IllumiScan         | Morikawa <sup>35)</sup> | Tokyo Medical and Dental University | 2017      | SCC         | 30    | ImageJ         | $97 \times 10^3$                    | 37.9       | 0.23        |
|                    |                         |                                     |           | OLP         | 25    |                | $52 \times 10^3$                    | 61.3       | 0.14        |
|                    |                         |                                     |           | control     | 55    |                | 820                                 | 73.6       | -           |
| IllumiScan         | Kikuta <sup>19)</sup>   | Kurume University                   | 2018      | SCC         | 31    | ImageJ         | $69 \times 10^3$                    | 93.4       | 0.3         |
|                    |                         |                                     |           | leukoplakia | 9     |                | $29 \times 10^3$                    | 146.6      | 0.21        |
|                    |                         |                                     |           | control     | 40    |                | $19 \times 10^2$                    | 145.9      | 0.24        |
| IllumiScan         | Sugahara <sup>33)</sup> | Tokyo Medical and Dental University | 2020      | SCC         | 7     | original**     | $21 \times 10^2$                    | 56         | -           |
|                    |                         |                                     |           | control     | 7     |                | $21 \times 10^2$                    | 147        | -           |
| IllumiScan ORALOOK | Morikawa <sup>34)</sup> | Tokyo Medical and Dental University | 2020      | SCC,        | 100   | ImageJ         | $16 \times 10^4$                    | 54.5       | 0.22        |
|                    |                         |                                     |           | OPMD        | 214   |                | $34 \times 10^3$ - $11 \times 10^4$ | 62.2-85.2  | 0.12-0.13   |
|                    |                         |                                     |           | control     | 314   |                | 830-890                             | 80.0-82.7  | 0.040-0.045 |
| IllumiScan         | Present study           | Hiroshima University                | 2019~2021 | SCC         | 59    | ImageJ         | $37 \times 10^3^*$                  | 88*        | 0.203*      |
|                    |                         |                                     |           | non-SCC     | 131   |                | $31 \times 10^3^*$                  | 109*       | 0.134*      |
|                    |                         |                                     |           | NOM         | 49    |                | $85 \times 10^3^*$                  | 155*       | 0.135*      |

\*median

\*\*Numerical settings for luminance are the same as in ImageJ. CV, coefficient of variation; FI, fluorescence intensity; SCC, squamous cell carcinoma; OPMD, oral potentially malignant disorder; OLP, oral lichen planus
